# Supplementary material
Source: PubMed Central journal article supplement (PMC10524902)
Supplement: NIHMS1905488-supplement-1.pdf [file NIHMS1905488-supplement-1.pdf]

**Figure S1**

**A**

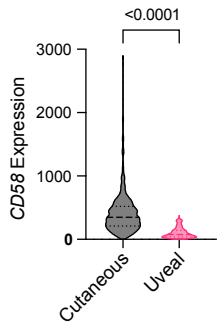

**B**

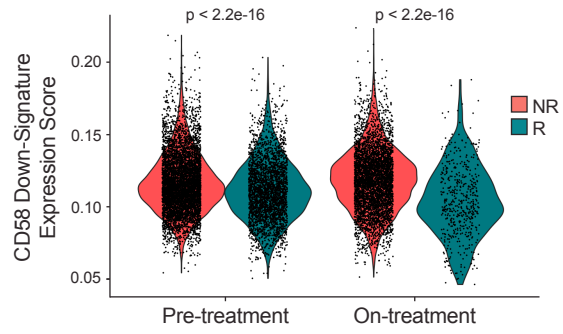

**C**

Jerby-Aron et al., 2018

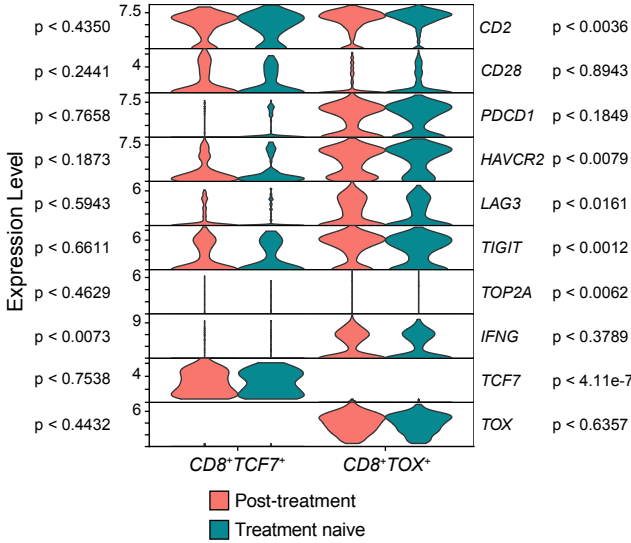

**D**

Sade-Feldman et al., 2018

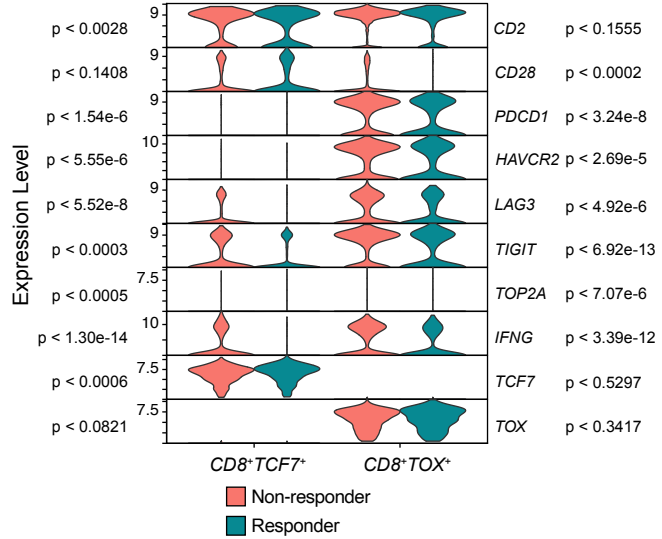

### Figure S1. RNA-seq analysis of melanoma patient tumors, Related to Figure 1

(A) Comparison of *CD58* expression (normalized count shown) in cutaneous and uveal melanomas from TCGA Pan-Cancer Atlas RNASeqV2 data, computed by RSEM. Dotted lines indicate 1<sup>st</sup> and 3<sup>rd</sup> quartiles, and dashed lines indicate median.

(B) *CD58* down-signature expression scores for malignant cells identified in scRNA-seq analysis of patient melanoma pre- and on-ICB-treatment biopsies from responders versus non-responders shown in Fig. 1A.

(C) scRNA-seq expression data from a previously published dataset of 33 human melanoma tumors from 31 patients<sup>7</sup> split into *CD8<sup>+</sup>TCF7<sup>+</sup>* and *CD8<sup>+</sup>TOX<sup>+</sup>* T cells. Samples are also separated by treatment status into either treatment-naïve tumors (n=15) or post-ICB resistant tumors (n=15).

(D) As in (C), but analysis is performed on another previously published scRNA-seq dataset of 48 tumor biopsies of metastatic melanoma patients treated with anti-PD-1 therapy<sup>20</sup>. Samples are separated into *CD8<sup>+</sup>TCF7<sup>+</sup>* and *CD8<sup>+</sup>TOX<sup>+</sup>* T cells, and non-responders (n=31) and responders (n=17).

Statistical analysis performed using Wilcoxon rank sum tests.

**Figure S2**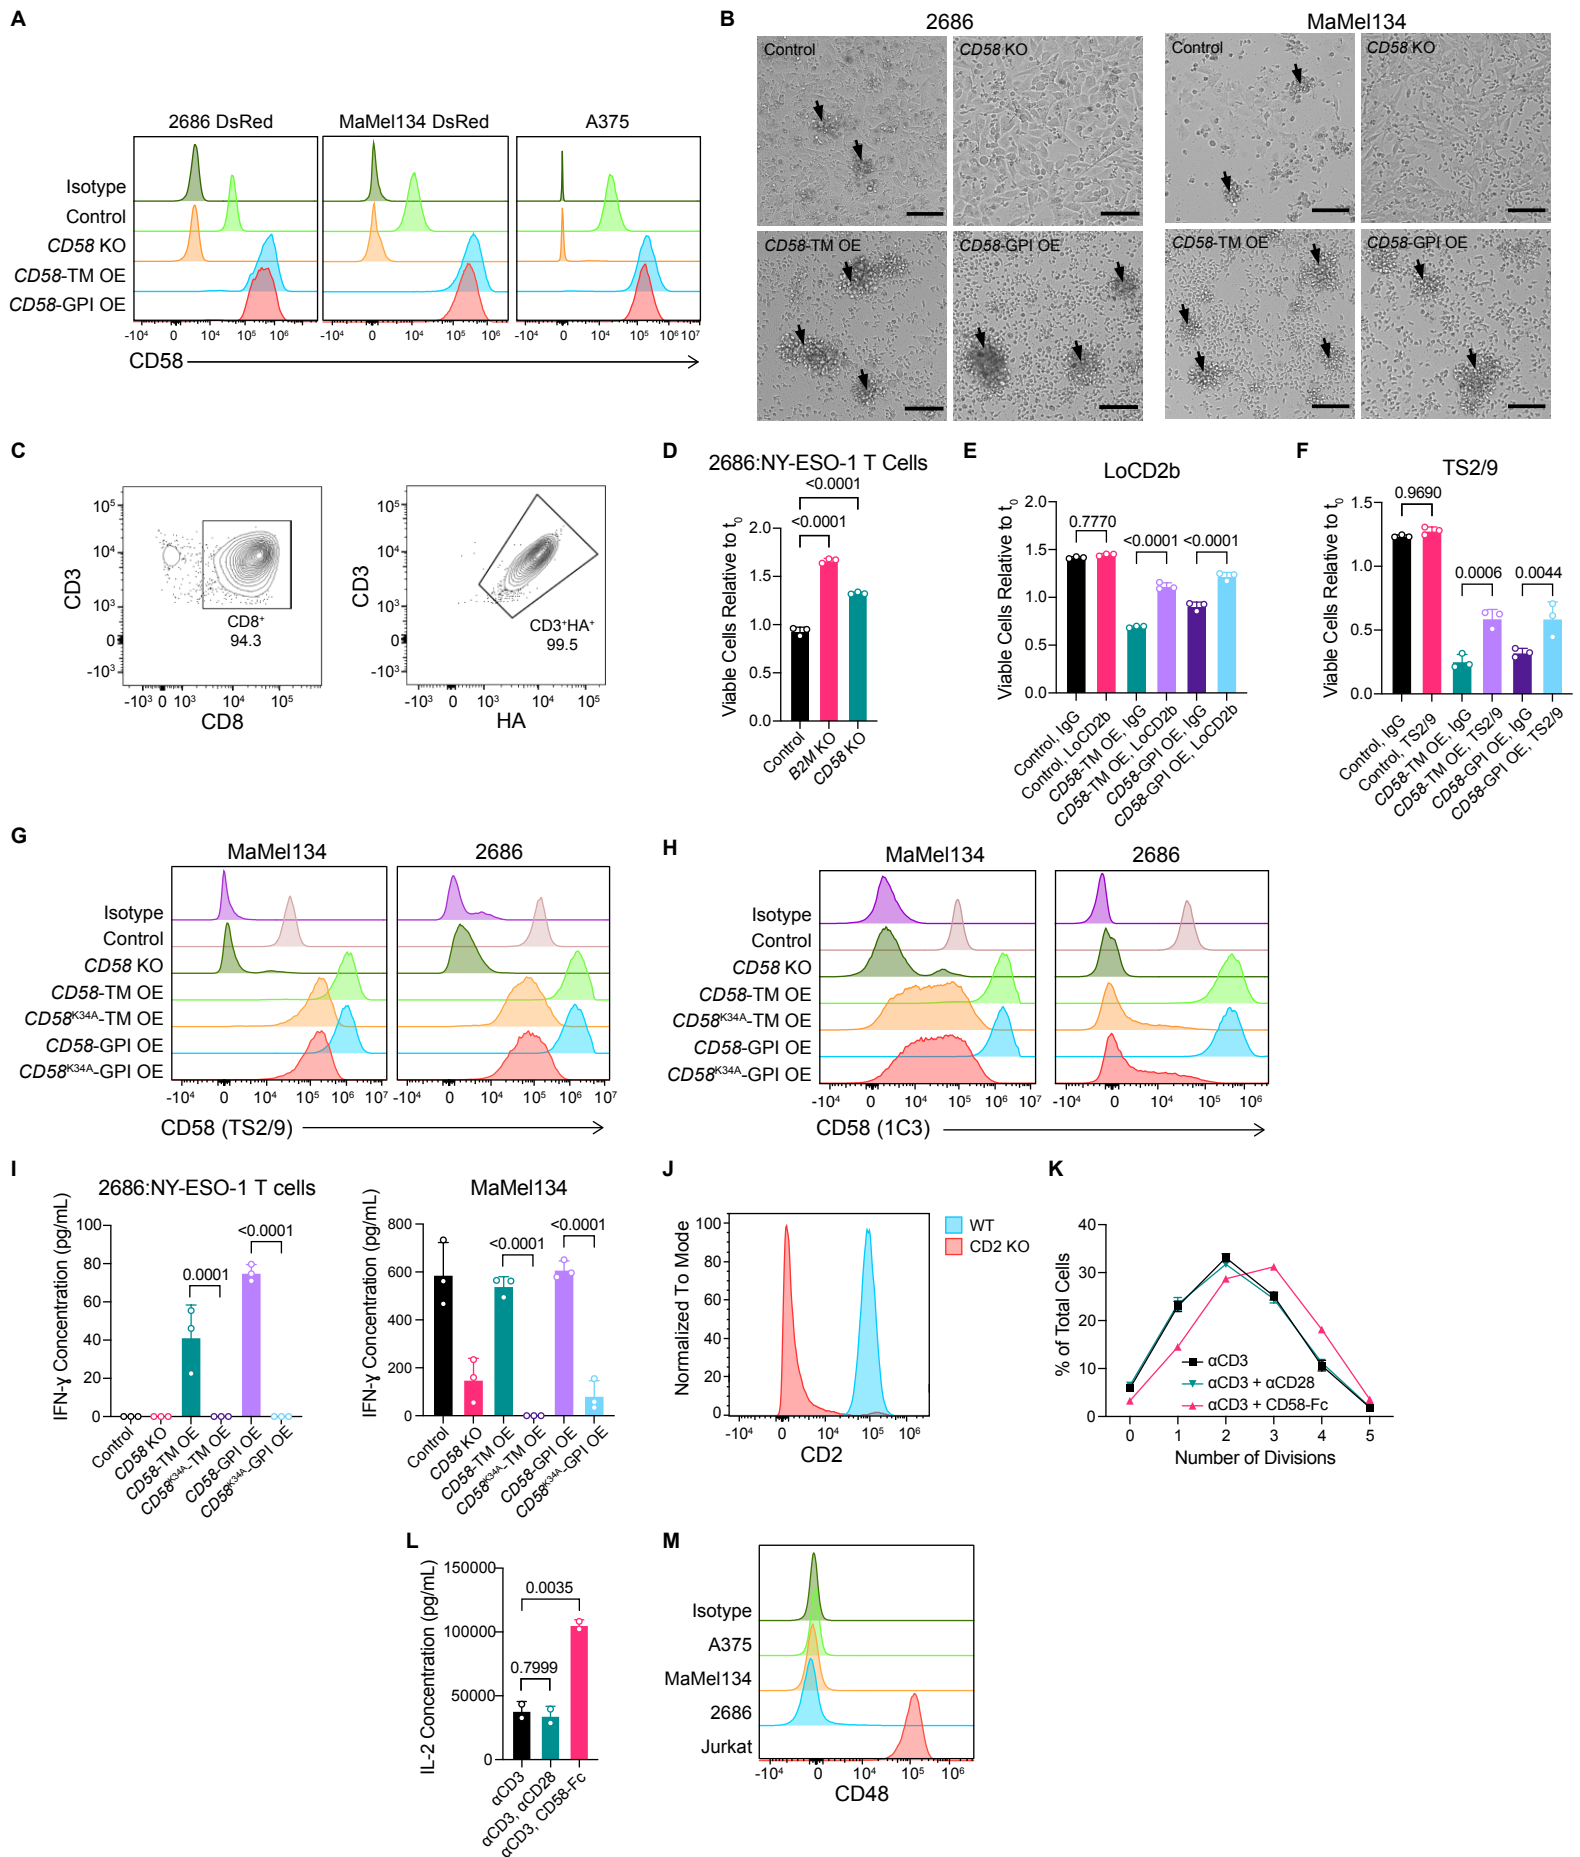

**Figure S2. CD58-CD2 ligation is critical to T-cell-mediated killing across cell lines, Related to Figure 1**

(A) Surface CD58 expression in 2686 DsRed, MaMel134 DsRed, and A375 control, *CD58* KO, and *CD58*-TM or *CD58*-GPI OE cells used in co-culture and flow cytometry experiments.

(B) Widefield images of 2686 and MaMel134 melanoma/TIL co-cultures shown in Figure 1C. Arrowheads indicate T cell clusters following T cell activation. Scale bar = 100  $\mu$ m.

(C) PBMC-derived T cells were sorted for CD8<sup>+</sup> T cells, which were then engineered to express an NY-ESO-1-specific TCR carrying an HA tag. CD8 and HA expression on engineered T cells was assessed by flow cytometry.

(D) Fold change in number of viable cells after 24 h co-culture of 2686 DsRed control, *B2M* KO, and *CD58* KO cells with NY-ESO-1-specific TCR engineered T cells.

(E-F) Fold change in number of viable MaMel134 cells after 48 h co-culture with autologous TILs in the presence of anti-CD2 blocking antibody (LoCD2b) (E), anti-CD58 (TS2/9) blocking antibody (F), or IgG isotype control.

(G-H) Binding of anti-CD58 antibody clones TS2/9 (G) and 1C3 (H) to cell surface CD58 in MaMel134 and 2686 control, *CD58* KO, *CD58*-TM, *CD58*<sup>K34A</sup>-TM, *CD58*-GPI, or *CD58*<sup>K34A</sup>-GPI OE cells as assessed by flow cytometry. Clones TS2/9 and 1C3 are known to inhibit CD58-CD2 binding<sup>22,68</sup>. Counts normalized to mode.

(I) IFN- $\gamma$  concentrations in cleared co-culture media from experiments shown in Figure 1E.

(J) Surface CD2 expression of WT and *CD2* KO MaMel134 TILs used in experiment shown in Figure 1F. Counts normalized to mode.

(K-L) MaMel134 TILs were stained with CFSE and stimulated for four days with 1  $\mu$ g/mL anti-CD3 (OKT3) antibody  $\pm$  1  $\mu$ g/mL anti-CD28 or CD58-Fc chimera. Number of cell divisions was quantified by flow cytometry analysis of remaining CFSE staining (K), and IL-2 concentrations within cleared culture media were quantified by ELISA (L).

(M) Surface CD48 expression in A375, MaMel134, 2686, and positive control Jurkat cells. Counts normalized to mode.

Representative images shown in (B) from at least two independent experiments each. Experiments performed in duplicate (K-L) or triplicate (D-F,I), with representative experiment shown from at least two independent experiments each. Statistical analysis performed using one-way ANOVA with Tukey's multiple comparisons testing. Data represent mean  $\pm$  SD.

**Figure S3**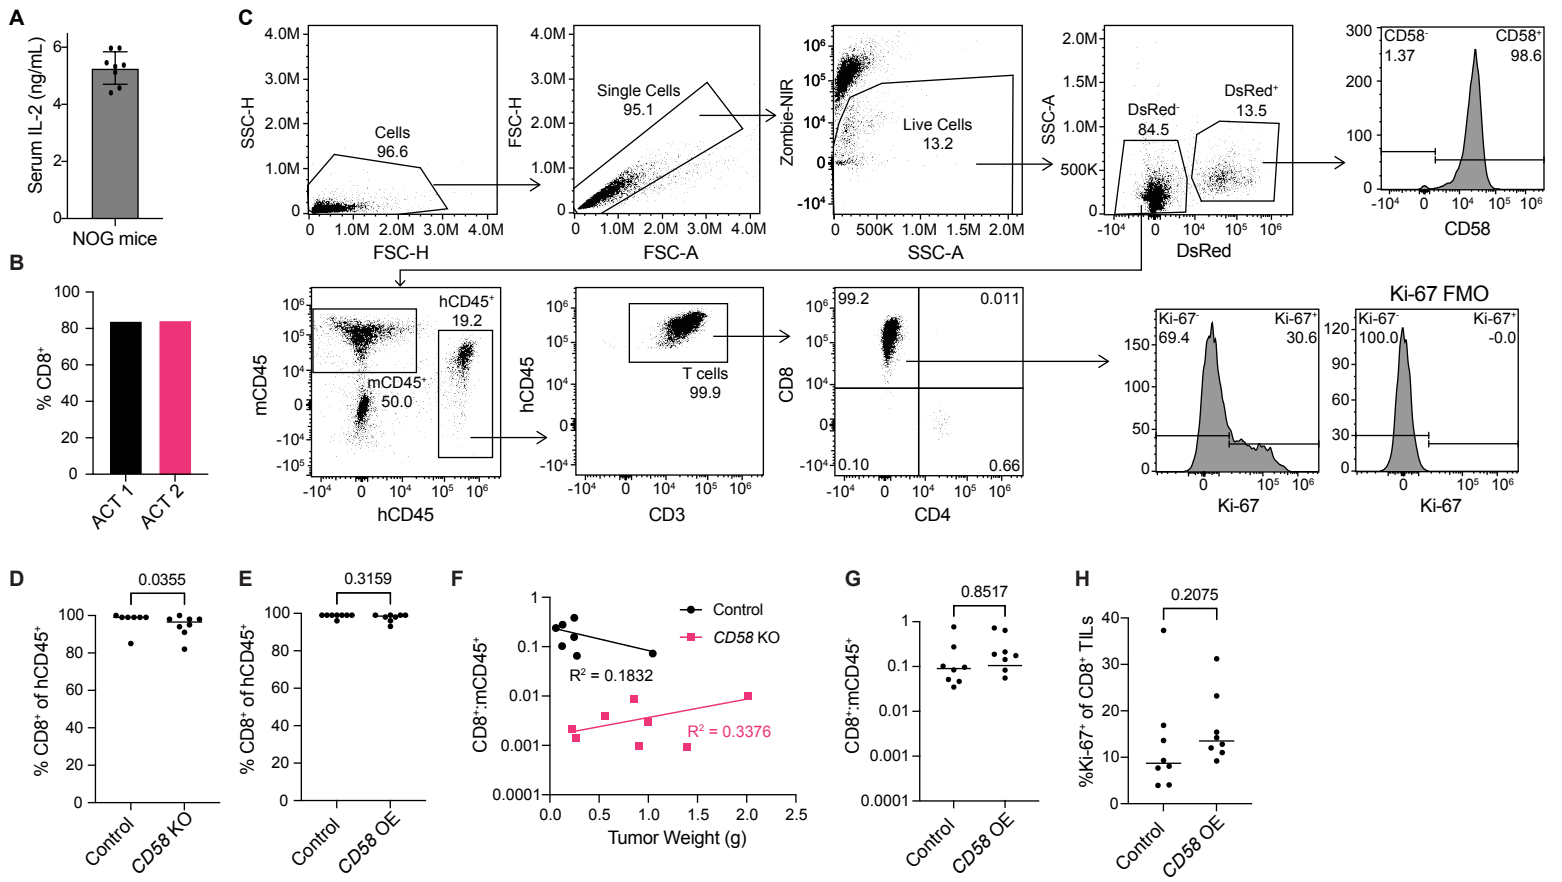

**Figure S3. *CD58* re-expression rescues  $CD8^+$  T cell infiltration and effector function within tumors in an *in vivo* model of ACT-treated melanoma, Related to Figure 2**

Data shown refer to experiments shown in Fig. 2A.

(A) Example IL-2 serum concentration in NOG mice (n=8).

(B) Percent of  $CD8^+$  cells among MaMel134 TILs used for each round of ACT prior to injection.

(C) Flow gating scheme used to identify and phenotype  $CD8^+$  human T cells from processed mouse tumors. Fluorescence minus one (FMO) control was used to determine Ki-67 expression.

(D-E) Percent of  $CD8^+$  cells among human  $CD45^+$  cells within control v. *CD58* KO melanoma tumors

(D) and control v. *CD58* OE tumors (E) at experiment endpoint.

(F) Human  $CD8^+$ :mouse  $CD45^+$  ratio within ACT-treated control and *CD58* KO tumors plotted against final tumor weight. Best fit semi-log line shown.

(G-H) Human  $CD8^+$ :mouse  $CD45^+$  ratio (G) and percent of human  $CD8^+$  TILs that are Ki-67<sup>+</sup> (H) within ACT-treated control and *CD58* OE MaMel134 tumors.

Statistical analysis performed using paired two-sided T-tests. Line at median (D,E,G,H). Data represent mean  $\pm$  SD (A).

**Figure S4**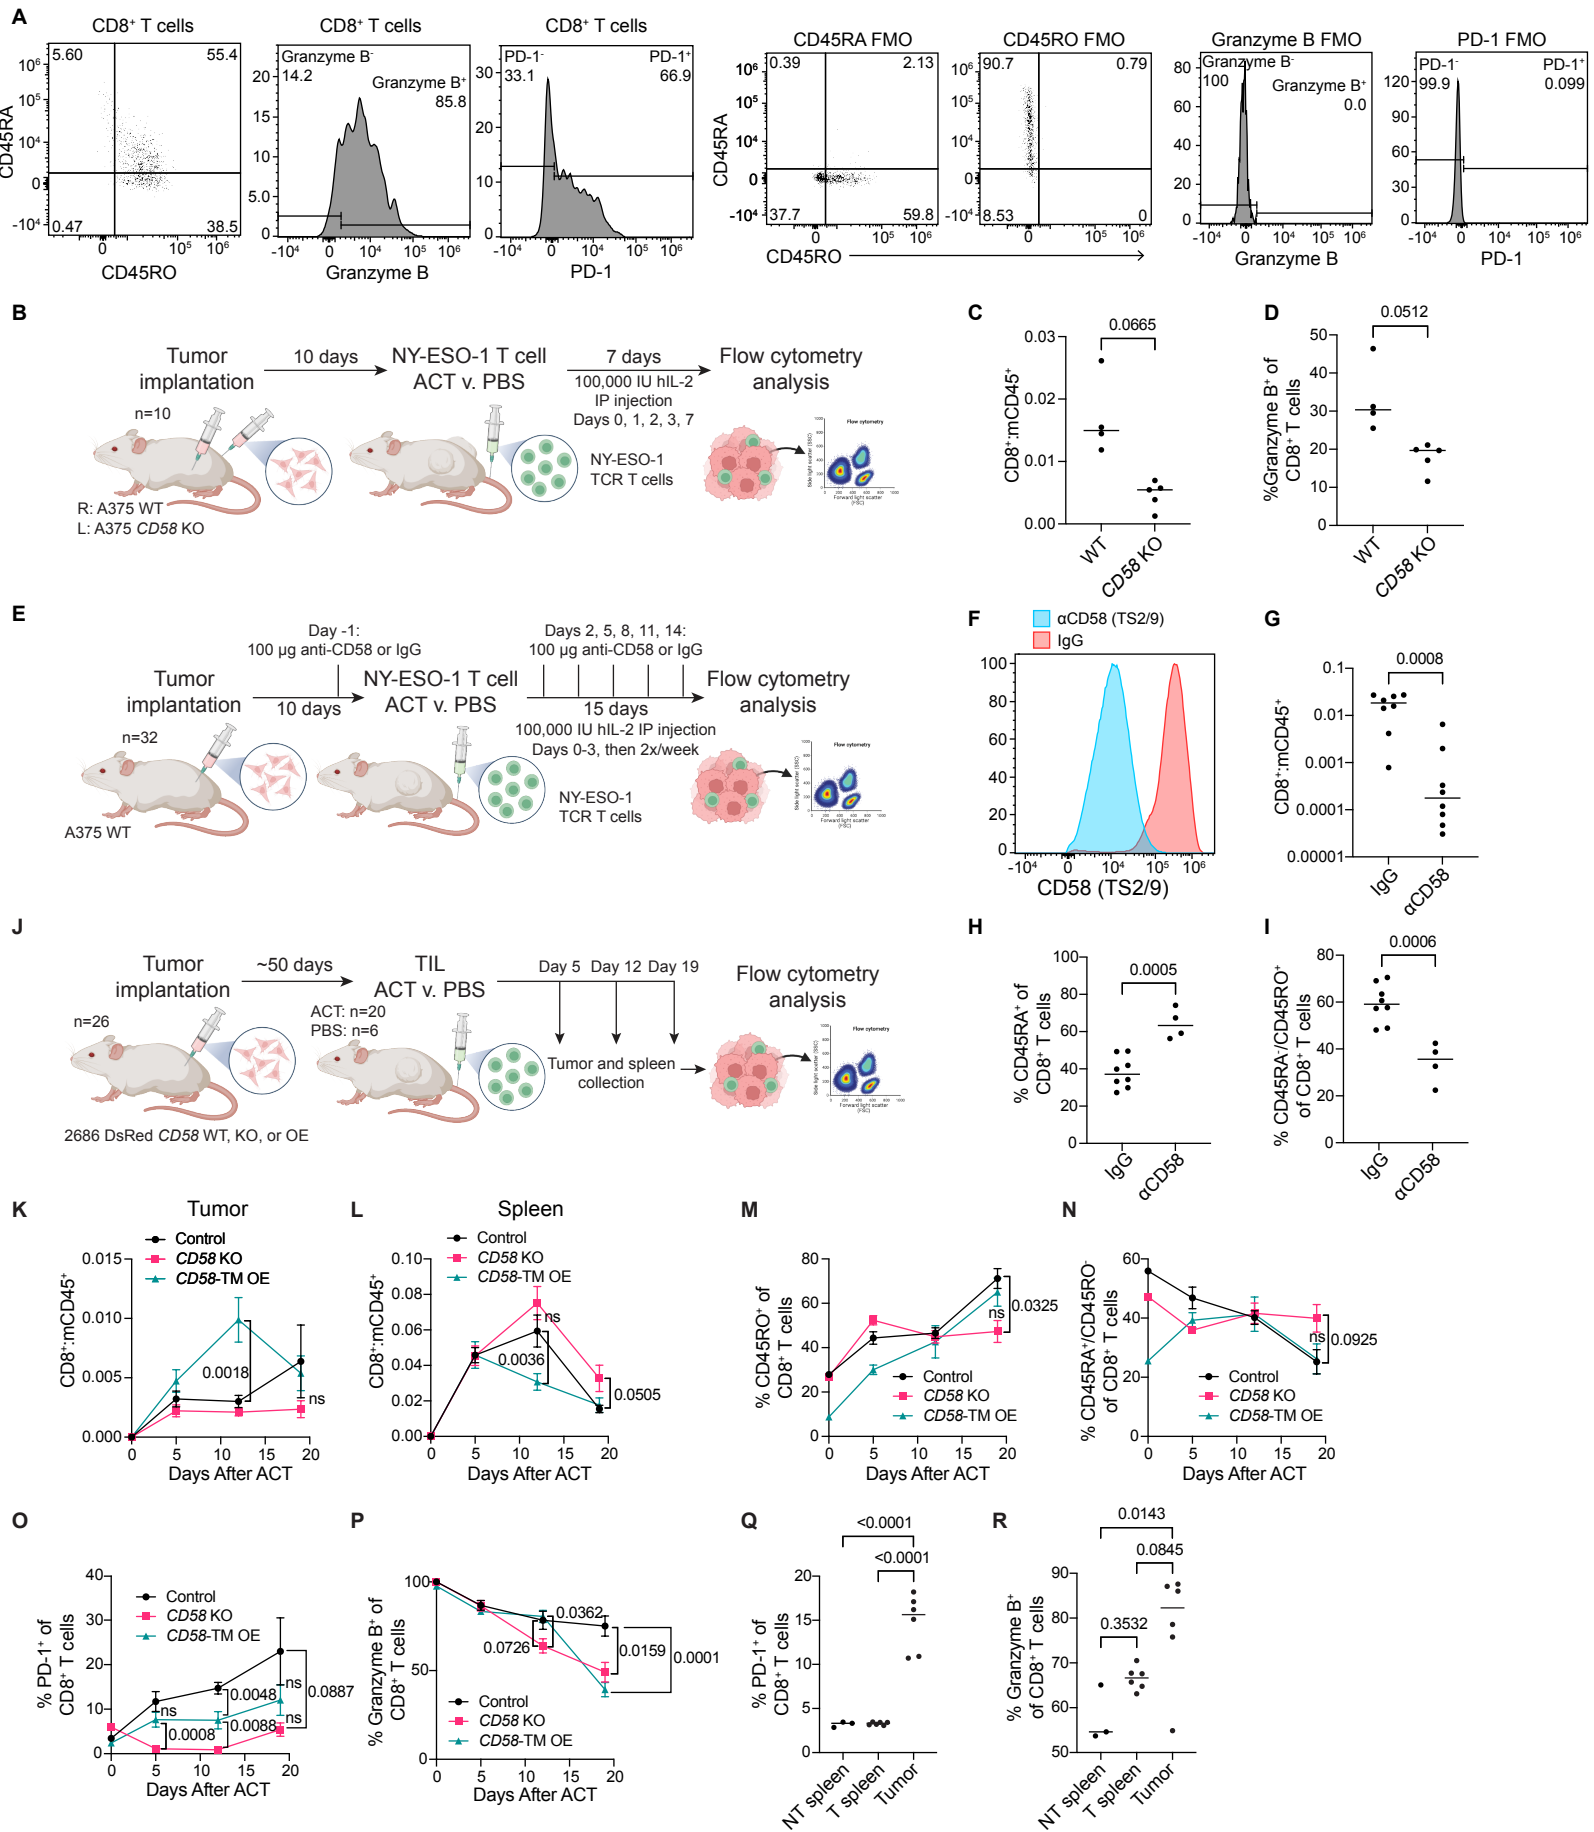

**Figure S4. Cancer-cell-intrinsic *CD58* loss is required for early intratumoral T cell infiltration, antigen recognition, and effector function in multiple *in vivo* models of ACT-treated melanoma, Related to Figure 2**

(A) Representative flow plots of CD8<sup>+</sup> T cell phenotyping for experiments shown in this figure. Gating used to identify human CD8<sup>+</sup> T cells is same as in Figure S3C. FMO controls were used to identify CD45RA<sup>-</sup>, CD45RO<sup>-</sup>, PD-1<sup>-</sup>, and granzyme-B-expressing cells.

(B) NSG mice (n=10) were implanted with A375 WT and *CD58* KO bilateral flank tumors and treated with ACT of NY-ESO-1 TCR-expressing T cells or PBS control (n=5 each) alongside human IL-2 IP injections for T cell maintenance. Tumors were collected 7 days after ACT for analysis by flow cytometry.

(C-D) Human CD8<sup>+</sup>:mouse CD45<sup>+</sup> ratio (C) and percent of human CD8<sup>+</sup> T cells that are granzyme B<sup>+</sup> (D) in WT and *CD58* KO ACT-treated tumors from experiment shown in (B).

(E) NSG mice (n=32) were implanted with single A375 WT flank tumors and treated with ACT of NY-ESO-1 TCR-expressing T cells or PBS control (n=16 each), alongside human IL-2 IP injections for T cell maintenance, as well as anti-*CD58* (TS2/9) or IgG isotype control (n=8 per group) by IP injection. 15 days after ACT, tumors were collected for analysis by flow cytometry.

(F) Representative plot showing binding of anti-*CD58* (TS2/9) PE-Cy5 to cell surface *CD58* in non-immune cells (human CD45<sup>-</sup>/mouse CD45<sup>-</sup>) of tumors from mice shown in (E) treated with anti-*CD58* (TS2/9) blocking antibody or IgG control.

(G-I) Human CD8<sup>+</sup>:mouse CD45<sup>+</sup> ratio (G) or percent of CD8<sup>+</sup> T cells that are CD45RA<sup>+</sup> (H) or CD45RA<sup>-</sup>/CD45RO<sup>+</sup> (I) in IgG v. anti-*CD58*-treated mice from experiment shown in (E).

(J) 2686 *CD58* WT, KO, or TM-OE patient-derived melanoma cells were implanted as single subcutaneous flank tumors (n=26 each), followed by ACT of NY-ESO-1 TCR-expressing T cells (n=20 each) or PBS control (n=6 each). Tumors and spleen were collected at days 5 (n=6 each), 12 (n=6 each), and 19 (n=8 each) after ACT for analysis by flow cytometry.

(K-L) Human CD8<sup>+</sup>:mouse CD45<sup>+</sup> ratio in tumors (K) and spleens (L) of mice shown in (J) days 5, 12, and 19 after ACT.

(M-P) Percentage of CD8<sup>+</sup> human T cells within tumors from mice shown in (J) that are CD45RO<sup>+</sup> (M), CD45RA<sup>+</sup>/CD45RO<sup>-</sup> (N), PD-1<sup>+</sup> (O), or granzyme B<sup>+</sup> (P).

(Q-R) Additional NSG mice (n=3) without tumor xenografts were treated as in (J), with spleens collected on day 12 after ACT. Percentage of CD8<sup>+</sup> human T cells shown within spleens and tumor from non-tumor-bearing (NT) and *CD58* WT tumor-bearing (T) mice collected at day 12 that are PD-1<sup>+</sup> (Q) or granzyme B<sup>+</sup> (R).



Statistical analysis performed using paired (C-D) and unpaired (G-I) two-sided T-tests or one-way ANOVA with Tukey's multiple comparisons test (K-R). Line at median. Data represent mean  $\pm$  SEM (K-P).

**Figure S5**

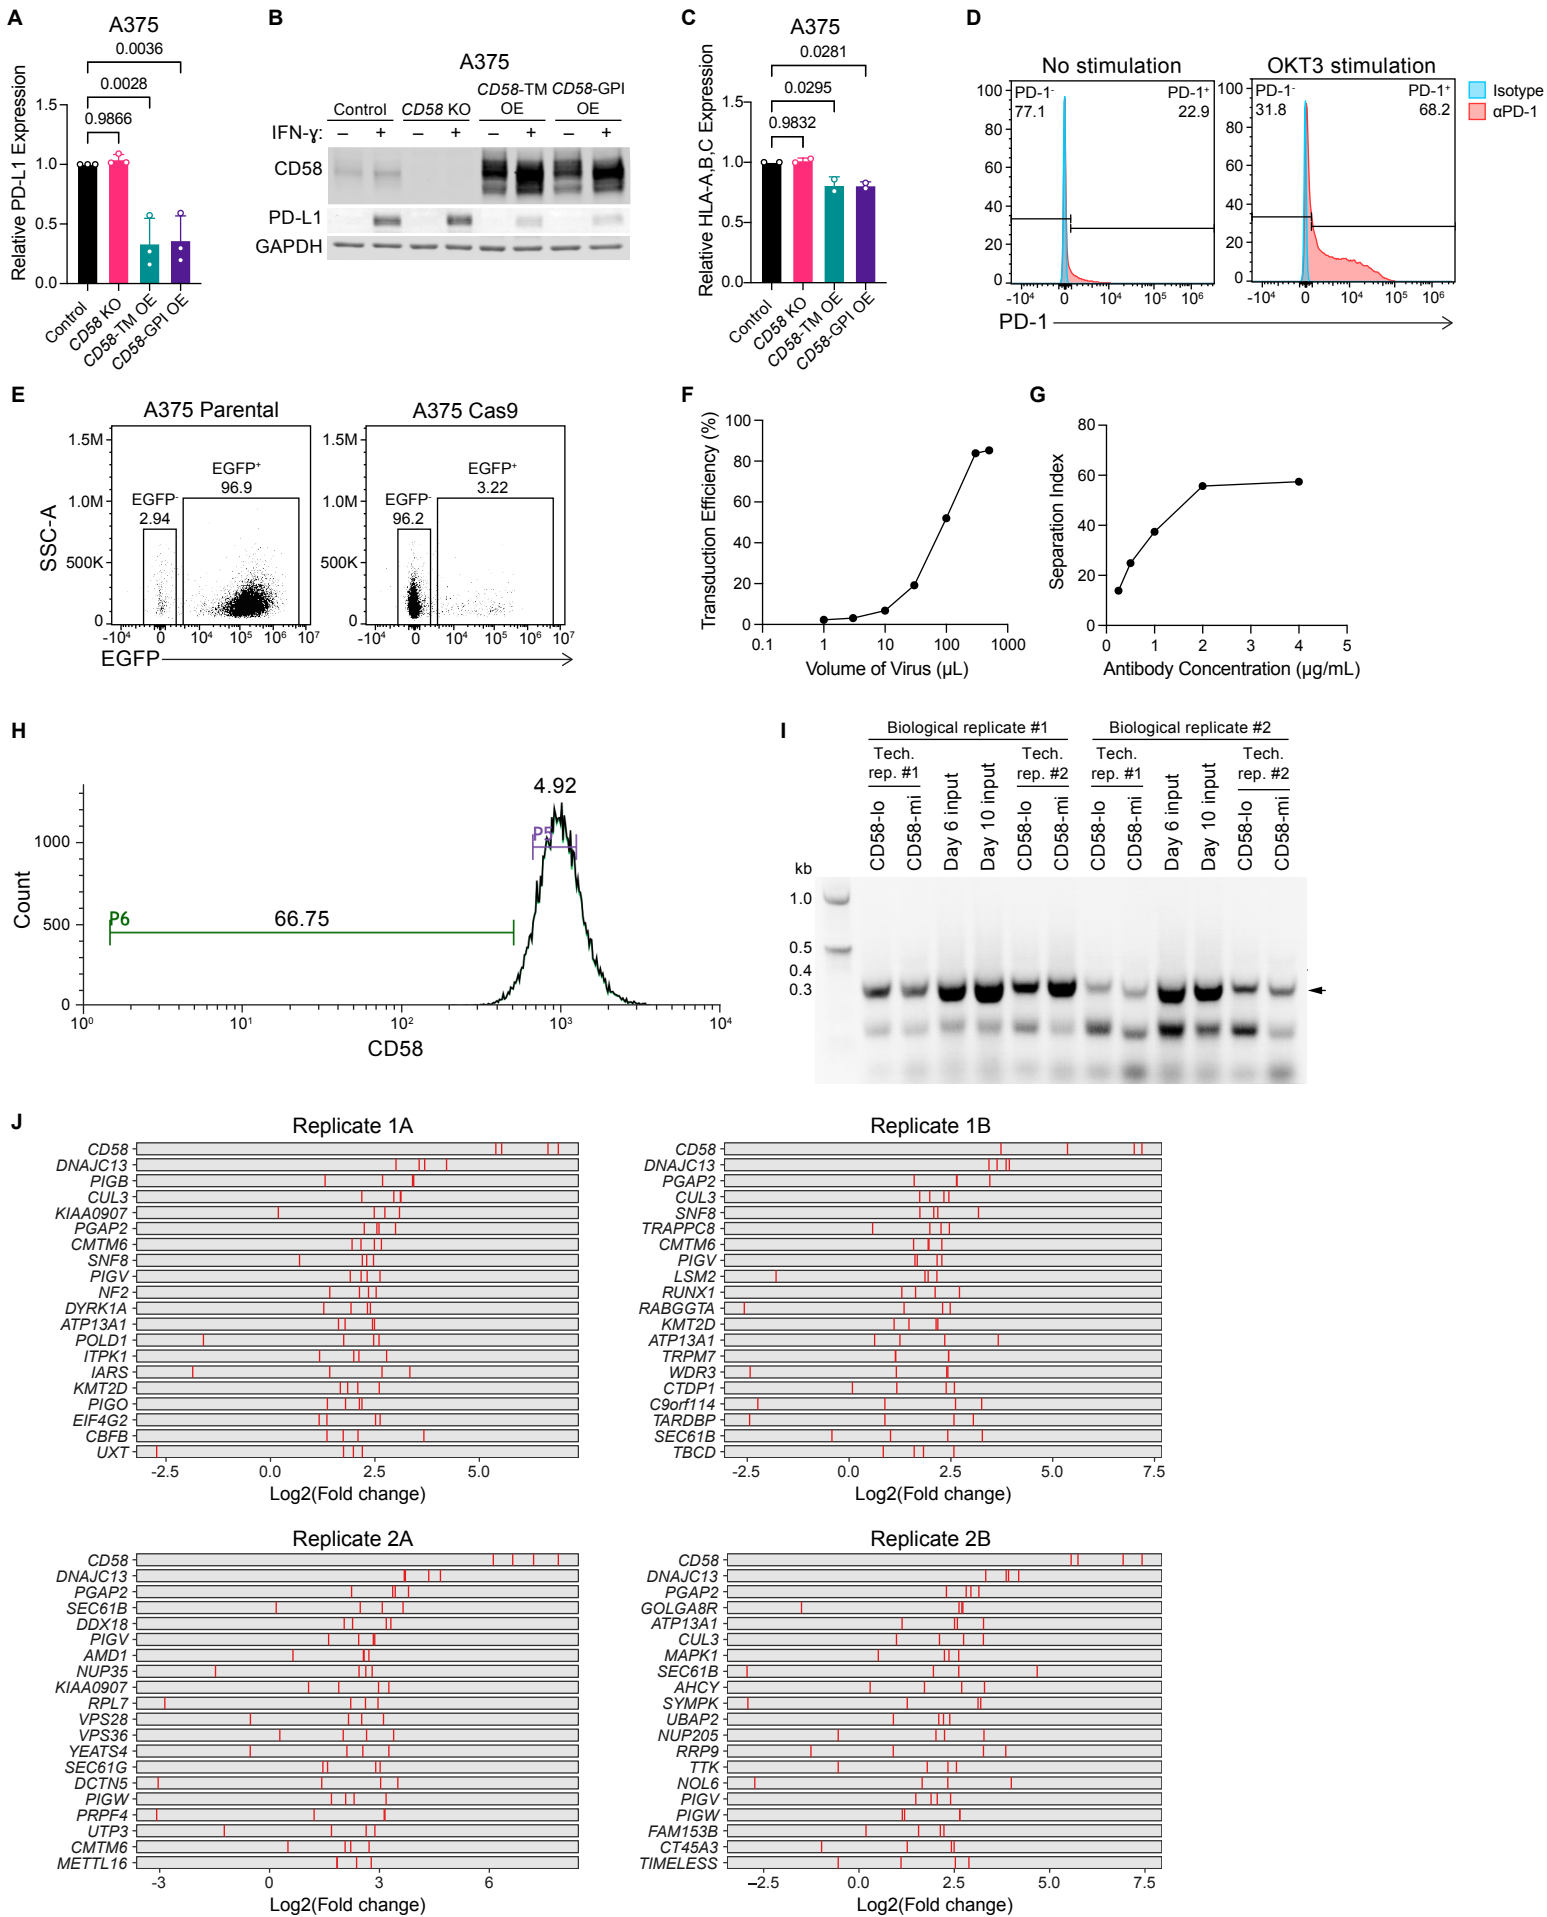

**Figure S5. Negative regulation of PD-L1 expression by CD58 and preparation and analysis of CRISPR-Cas9 KO screen to identify regulators of CD58, Related to Figures 3 and 4**

(A-B) Surface (A) and whole protein (B) PD-L1 expression in A375 WT, *CD58* KO, *CD58*-TM OE, and *CD58*-GPI OE cells after 72 h with 10 ng/mL IFN- $\gamma$ .

(C) As in (A), but showing HLA-A,B,C expression.

(D) Surface PD-1 expression among CD8<sup>+</sup> MaMel134 TILs after overnight stimulation with or without 1  $\mu$ g/mL anti-CD3 (OKT3) prior to co-culture with autologous melanoma cells shown in Figure 3E. Counts normalized to mode.

(E) Cas9 activity of A375 cells transduced with pLX\_311-Cas9 lentivirus was assessed by transduction with pXPR-011 lentivirus encoding both EGFP and EGFP-targeting sgRNA. Percent Cas9 activity represented by percentage of EGFP<sup>-</sup> cells.

(F) A375 Cas9-expressing cells were transduced with Brunello genome-wide sgRNA library at increasing virus volumes per 1 million cells for a desired transduction efficiency of 20% (MOI<0.3). 30  $\mu$ L virus was used for screen.

(G) Anti-CD58-APC antibody was titrated for use in assessing CD58 surface expression in CRISPR-Cas9 screen. 2  $\mu$ g/mL antibody was used for FACS.

(H) Following 10 days of culturing, CRISPR-Cas9 screen cells were sorted based on CD58 surface expression. Representative gating of CD58<sup>lo</sup> (P6) and CD58<sup>mi</sup> (P5) control populations shown.

(I) Following sort of target and control populations, sgRNA sequences were PCR amplified, with a desired PCR product size of ~354 bp (arrow).

(J) Distribution of sgRNA guide enrichment for top 20 gene targets from each replicate of CRISPR-Cas9 screen (Table S2-3). Red bars indicate log<sub>2</sub> fold enrichment of each sgRNA per gene within the CD58<sup>lo</sup> population compared to CD58<sup>mi</sup> control population for each replicate (biological replicates 1 and 2, each with technical replicates A and B), with genes ranked from top to bottom by increasing P-value.

Experiments performed in duplicate with independent experiments shown (A,C). Representative blot shown of at least two independent experiments (B). Statistical analyses performed using one-way ANOVA with Tukey's multiple comparisons test. Data represent mean  $\pm$  SD.

**Figure S6**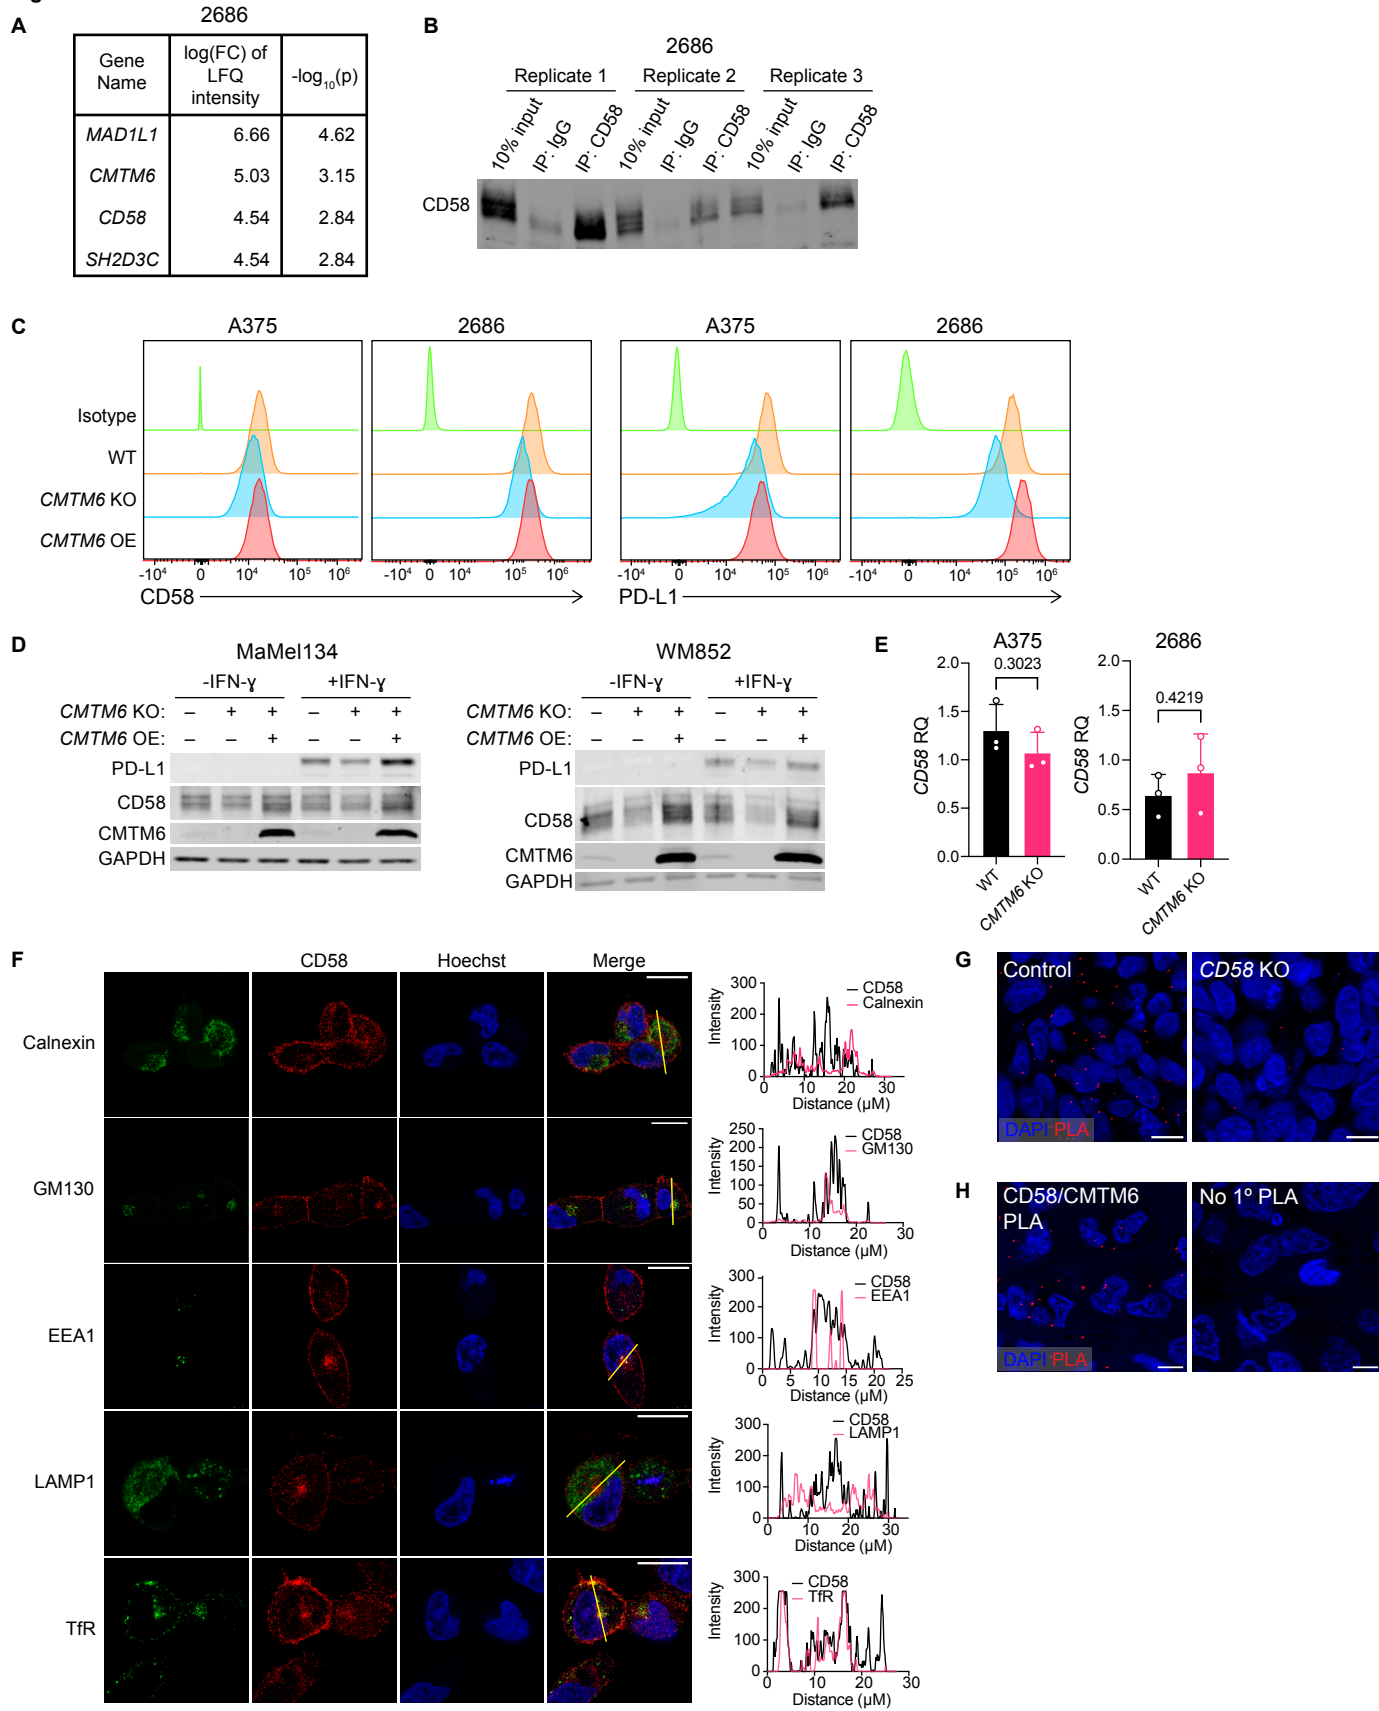

**Figure S6. CMTM6 regulates CD58 at a protein level across multiple cell lines, Related to Figure 5**

- (A) Genes whose encoded proteins were enriched in CD58 IP versus IgG isotype IP lysates from 2686 melanoma cells by mass-spectrometry analysis. Inclusion criteria as in Fig. 5A. Experiment was performed with three biological replicates.
- (B) Immunoblotting for CD58 of 2686 CD58 immunoprecipitates used for IP-MS analysis in (A).
- (C) Representative flow plots for data shown in Figures 5C-D.
- (D) Whole protein PD-L1, CD58, and CMTM6 expression in MaMel134 DsRed and WM852 control, *CMTM6* KO, and *CMTM6* OE cells after 72 h  $\pm$  10 ng/mL IFN- $\gamma$  stimulation.
- (E) Relative gene expression of *CD58* in A375 and 2686 WT or *CMTM6* KO cells after 72 h with 10 ng/mL IFN- $\gamma$  stimulation.
- (F) 2686 WT cells were fixed and immunostained for CD58 alongside markers of ER (Calnexin), Golgi (GM130), early endosomes (EEA1), lysosomes (LAMP1), and recycling endosomes (TfR), and analyzed by confocal microscopy. Profile plots of relative fluorescence intensity along yellow line shown at right. Scale bars = 20  $\mu$ m.
- (G-H) Representative images for data shown in Figure 5I (G) and Figures 5J-K (H). Foci indicating CD58-CMTM6 interactions shown in red. Scale bars = 10  $\mu$ m.
- Representative images shown from at least two independent experiments (D, F). Experiments in (E) each performed with four technical replicates, with independent experiments shown. Statistical analysis performed with two-sided T-test. Data represent mean  $\pm$  SD.

**Figure S7**

**A**

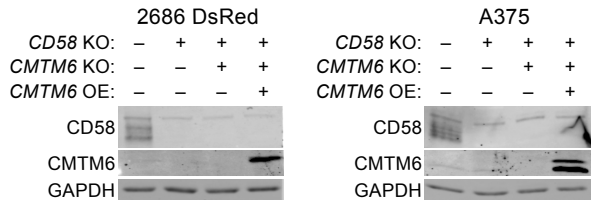

**B**

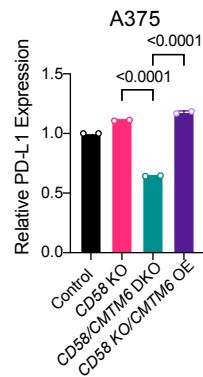

**C**

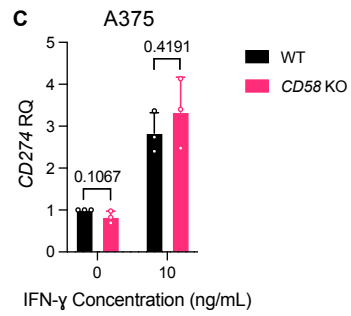

**D**

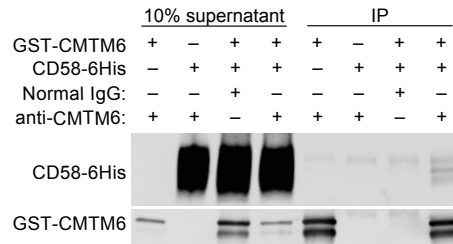

**E**

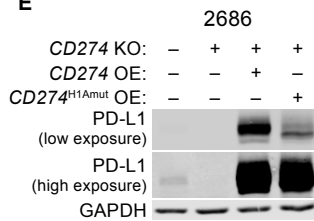

**F**

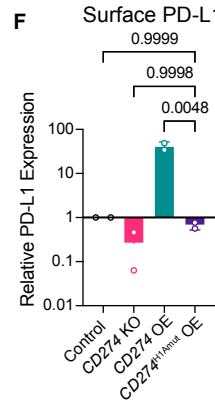

**G**

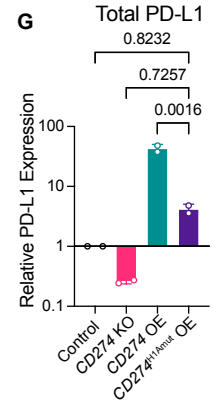

**H**

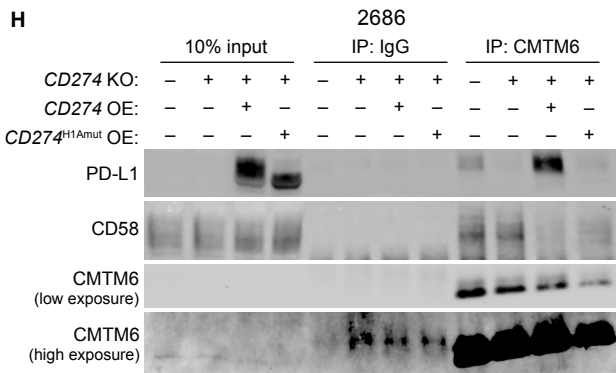

**I**

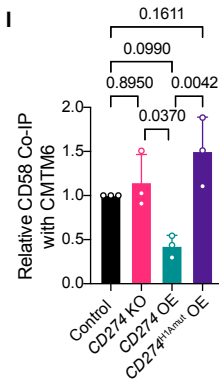

**J**

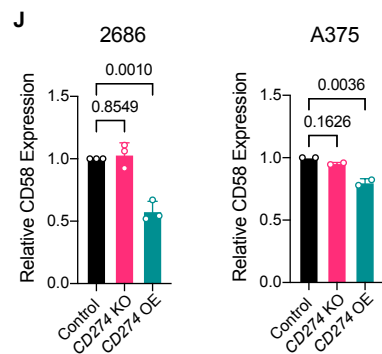

**K**

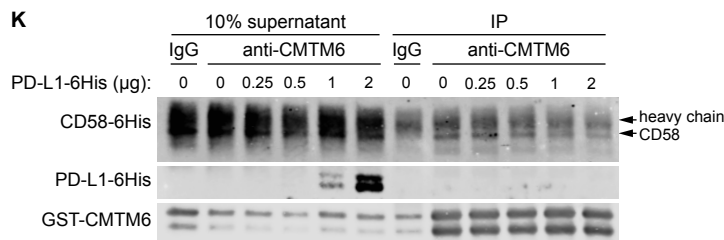

## Figure S7. CMTM6 is critical for CD58's regulation of PD-L1, Related to Figure 6

- (A) Validation of whole protein CD58 and CMTM6 expression levels of cells used in Figure 6A and S7B.
- (B) Surface expression levels of PD-L1 in A375 WT, *CD58* KO, *CD58/CMTM6* DKO, and *CD58* KO/*CMTM6* OE cells after 72 h with 10 ng/mL IFN- $\gamma$ .
- (C) Relative gene expression of *CD274* in A375 WT or *CD58* KO cells after 72 h  $\pm$  10 ng/mL IFN- $\gamma$  stimulation.
- (D) Co-IP of CD58-6His with GST-CMTM6 from a mixture of 5  $\mu$ g CD58-6His and/or 1  $\mu$ g GST-CMTM6 purified recombinant proteins.
- (E) Immunoblotting for PD-L1 expression in 2686 WT, *CD274* KO, *CD274* OE, and *CD274*<sup>H1Amut</sup> OE cells after 72 h with 10 ng/mL IFN- $\gamma$ .
- (F-G) Relative surface (F) and total (G) PD-L1 expression in 2686 WT, *CD274* KO, *CD274* OE, and *CD274*<sup>H1Amut</sup> OE cells after 72 h with 10 ng/mL IFN- $\gamma$  assessed by surface  $\pm$  intracellular flow staining of PD-L1.
- (H) Co-IP of CD58 and PD-L1 with CMTM6 in 2686 WT, *CD274* KO, *CD274* OE, and *CD274*<sup>H1Amut</sup> OE cells after 72 h with 10 ng/mL IFN- $\gamma$ .
- (I) Quantification of CD58 co-IP relative to CMTM6 IP shown in (H).
- (J) Surface expression levels of CD58 in 2686 and A375 WT, *CD274* KO and *CD274* OE cells after 72 h with 10 ng/mL IFN- $\gamma$ . A375 *CD274* KO cells were not sortable due to lack of baseline PD-L1 expression without IFN- $\gamma$  stimulation; *CD274* KO and OE cells were therefore gated on from mixed population to assess CD58 expression.
- (K) Co-IP of PD-L1-6His and CD58-6His protein with GST-CMTM6 protein from a mixture of 1  $\mu$ g CD58-6His, 1  $\mu$ g GST-CMTM6, and increasing amounts of PD-L1-6His purified recombinant proteins. Experiment in (C) performed with four technical replicates, with independent experiments shown. Experiments in (B, F, G, J) performed in duplicate, with independent experiments shown. Independent experiments shown in (I). Representative blots from at least two independent experiments shown (D, E, H, K). Statistical analysis performed using two-sided T-tests (C) and one-way ANOVA with Tukey's multiple comparison testing (B, F, G, I, J). Data represent mean  $\pm$  SD.

**Table S5. P5 and P7 primers for CRISPR-Cas9 KO screen, Related to STAR Methods**

| OLIGONUCLEOTIDE                                                                                                  | SOURCE                      | IDENTIFIER |
|------------------------------------------------------------------------------------------------------------------|-----------------------------|------------|
| P5 0 nt stagger:<br>AATGATACGGCGACCACCGAGATCTACACTCTTTCCCTACACGACG<br>CTCTTCCGATCTTTGTGGAAAGGACGAAACACCG         | Doench et al. <sup>26</sup> | N/A        |
| P5 1 nt stagger:<br>AATGATACGGCGACCACCGAGATCTACACTCTTTCCCTACACGACG<br>CTCTTCCGATCTCTTGTGGAAAGGACGAAACACCG        | Doench et al. <sup>26</sup> | N/A        |
| P5 2 nt stagger:<br>AATGATACGGCGACCACCGAGATCTACACTCTTTCCCTACACGACG<br>CTCTTCCGATCTGCTTGTGGAAAGGACGAAACACCG       | Doench et al. <sup>26</sup> | N/A        |
| P5 3 nt stagger:<br>AATGATACGGCGACCACCGAGATCTACACTCTTTCCCTACACGACG<br>CTCTTCCGATCTAGCTTGTGGAAAGGACGAAACACCG      | Doench et al. <sup>26</sup> | N/A        |
| P5 4 nt stagger:<br>AATGATACGGCGACCACCGAGATCTACACTCTTTCCCTACACGACG<br>CTCTTCCGATCTCAACTTGTGGAAAGGACGAAACACCG     | Doench et al. <sup>26</sup> | N/A        |
| P5 6 nt stagger:<br>AATGATACGGCGACCACCGAGATCTACACTCTTTCCCTACACGACG<br>CTCTTCCGATCTTGCACCTTGTGGAAAGGACGAAACACCG   | Doench et al. <sup>26</sup> | N/A        |
| P5 7 nt stagger:<br>AATGATACGGCGACCACCGAGATCTACACTCTTTCCCTACACGACG<br>CTCTTCCGATCTACGCAACTTGTGGAAAGGACGAAACACCG  | Doench et al. <sup>26</sup> | N/A        |
| P5 8 nt stagger:<br>AATGATACGGCGACCACCGAGATCTACACTCTTTCCCTACACGACG<br>CTCTTCCGATCTGAAGACCCTTGTGGAAAGGACGAAACACCG | Doench et al. <sup>26</sup> | N/A        |
| P7 A09:<br>CAAGCAGAAGACGGCATAACGAGATCGGTGACCGTGACTGGAGTTCAGACGTG<br>TGCTCTT CCGATCTTCTACTATTCTTTCCCCTGCACTGT     | Doench et al. <sup>26</sup> | N/A        |
| P7 A10:<br>CAAGCAGAAGACGGCATAACGAGATTACAGAGGGTGACTGGAGTTCAGACGTG<br>TGCTCTT CCGATCTTCTACTATTCTTTCCCCTGCACTGT     | Doench et al. <sup>26</sup> | N/A        |
| P7 A11:<br>CAAGCAGAAGACGGCATAACGAGATATTGTCAAGTGACTGGAGTTCAGACGTG<br>GCTCTT CCGATCTTCTACTATTCTTTCCCCTGCACTGT      | Doench et al. <sup>26</sup> | N/A        |
| P7 A12:<br>CAAGCAGAAGACGGCATAACGAGATTATGTCTTGTGACTGGAGTTCAGACGTG<br>GCTCTT CCGATCTTCTACTATTCTTTCCCCTGCACTGT      | Doench et al. <sup>26</sup> | N/A        |
| P7 B09:<br>CAAGCAGAAGACGGCATAACGAGATTAGTTCTTGTGACTGGAGTTCAGACGTG<br>GCTCTT CCGATCTTCTACTATTCTTTCCCCTGCACTGT      | Doench et al. <sup>26</sup> | N/A        |
| P7 B10:<br>CAAGCAGAAGACGGCATAACGAGATTACAAGTTGTGACTGGAGTTCAGACGTG<br>GCTCTT CCGATCTTCTACTATTCTTTCCCCTGCACTGT      | Doench et al. <sup>26</sup> | N/A        |
| P7 C09:<br>CAAGCAGAAGACGGCATAACGAGATCGTGAGTTGTGACTGGAGTTCAGACGTG<br>TGCTCTT CCGATCTTCTACTATTCTTTCCCCTGCACTGT     | Doench et al. <sup>26</sup> | N/A        |
| P7 C10:<br>CAAGCAGAAGACGGCATAACGAGATATCAGATTGTGACTGGAGTTCAGACGTG<br>GCTCTT CCGATCTTCTACTATTCTTTCCCCTGCACTGT      | Doench et al. <sup>26</sup> | N/A        |
| P7 C11:<br>CAAGCAGAAGACGGCATAACGAGATTAGTGATTGTGACTGGAGTTCAGACGTG<br>GCTCTT CCGATCTTCTACTATTCTTTCCCCTGCACTGT      | Doench et al. <sup>26</sup> | N/A        |
| P7 C12:<br>CAAGCAGAAGACGGCATAACGAGATCGGTTCCGGTGACTGGAGTTCAGACGTG<br>TGCTCTT CCGATCTTCTACTATTCTTTCCCCTGCACTGT     | Doench et al. <sup>26</sup> | N/A        |
| P7 D09:<br>CAAGCAGAAGACGGCATAACGAGATCGCATCTTGTGACTGGAGTTCAGACGTG<br>GCTCTT CCGATCTTCTACTATTCTTTCCCCTGCACTGT      | Doench et al. <sup>26</sup> | N/A        |



|                                                                                                              |                             |     |
|--------------------------------------------------------------------------------------------------------------|-----------------------------|-----|
| P7 D10:<br>CAAGCAGAAGACGGCATAACGAGATATGTTCAAGTGACTGGAGTTCAGACGTG<br>GCTCTT CCGATCTTCTACTATTCTTTCCCCTGCACTGT  | Doench et al. <sup>26</sup> | N/A |
| P7 G01:<br>CAAGCAGAAGACGGCATAACGAGATGCGTAGCCGTGACTGGAGTTCAGACGTG<br>TGCTCTT CCGATCTTCTACTATTCTTTCCCCTGCACTGT | Doench et al. <sup>26</sup> | N/A |
